# Supplementary material for: Development of the SAFE Checklist Tool for Assessing Site-Level Threats to Child Protection: Use of Delphi Methods and Application to Two Sites in India
Source: PLOS journal article supplement (doi:10.1371/journal.pone.0141222), 2015-11-05
Supplement: S1 (10.1371/journal.pone.0141222.s001) [file journal.pone.0141222.s001]

# SAFE Checklist

## To Advance the Protection of Children & Youth

### PART 1

*This set of questions asks about things relating to the health of children (ages 0-18) at the [NAME OF SITE]. Please circle the answer to the following questions to the best of your knowledge. You may not know all the answers. If you cannot answer a question, please leave the question blank.*

|      | To the best of your knowledge, <u>how many of the children</u> (ages 0-18) at the [NAME OF SITE] currently <u>have access to</u> : | None (0%) | Few (1%-25%) | Some (26%-50%) | Most (51%-75%) | Almost all/All (76%-100%) |
|------|------------------------------------------------------------------------------------------------------------------------------------|-----------|--------------|----------------|----------------|---------------------------|
| 1.1  | Clean drinking water?                                                                                                              | None      | Few          | Some           | Most           | Almost all/All            |
| 1.2  | Hospitals and/or health clinics?                                                                                                   | None      | Few          | Some           | Most           | Almost all/All            |
| 1.3  | Doctors, nurses, community health workers, and/or health volunteers?                                                               | None      | Few          | Some           | Most           | Almost all/All            |
| 1.4  | Free health services?                                                                                                              | None      | Few          | Some           | Most           | Almost all/All            |
| 1.5  | Health services that can be reached by accessible roads?                                                                           | None      | Few          | Some           | Most           | Almost all/All            |
| 1.6  | Health services that can be reached by public transportation, such as bus or auto rickshaw? <sup>a</sup>                           | None      | Few          | Some           | Most           | Almost all/All            |
| 1.7  | Health services that are open 24 hours a day and 7 days per week?                                                                  | None      | Few          | Some           | Most           | Almost all/All            |
| 1.8  | Sexual health services such as testing, counseling, and treatment for HIV and/or other sexually transmitted infections?            | None      | Few          | Some           | Most           | Almost all/All            |
| 1.9  | Medical treatment for diarrhea?                                                                                                    | None      | Few          | Some           | Most           | Almost all/All            |
| 1.10 | Medical treatment for dengue?                                                                                                      | None      | Few          | Some           | Most           | Almost all/All            |
| 1.11 | Medical treatment for malaria?                                                                                                     | None      | Few          | Some           | Most           | Almost all/All            |
| 1.12 | Medical treatment for coughs and/or difficulty breathing?                                                                          | None      | Few          | Some           | Most           | Almost all/All            |

<sup>a</sup> Item adapted for use in India.

Do not distribute without written consent. For more information, please contact:

**Theresa S. Betancourt, Sc.D., M.A.**

Director, Research Program on Children and Global Adversity | Harvard T.H. Chan School of Public Health  
Department of Global Health and Population | Email: Theresa\_Betancourt@harvard.edu

# SAFE Checklist

## To Advance the Protection of Children & Youth

|      | To the best of your knowledge, <u>how many of the girls and/or women</u> at the [NAME OF SITE] currently <u>have access to</u> : | None<br>(0%) | Few<br>(1%-25%) | Some<br>(26%-50%) | Most<br>(51%-75%) | Almost<br>all/All<br>(76%-100%) |
|------|----------------------------------------------------------------------------------------------------------------------------------|--------------|-----------------|-------------------|-------------------|---------------------------------|
| 1.13 | Medical care before having a baby and/or medical care after having a baby?                                                       | None         | Few             | Some              | Most              | Almost all/All                  |
| 1.14 | Birth control methods such as condoms and/or birth control pills?                                                                | None         | Few             | Some              | Most              | Almost all/All                  |
| 1.15 | Abortion services—having trained medical workers end a pregnancy?                                                                | None         | Few             | Some              | Most              | Almost all/All                  |

|      | To the best of your knowledge, <u>how many of the children</u> (ages 0-18) at the [NAME OF SITE] currently:     | None<br>(0%) | Few<br>(1%-25%) | Some<br>(26%-50%) | Most<br>(51%-75%) | Almost<br>all/All<br>(76%-100%) |
|------|-----------------------------------------------------------------------------------------------------------------|--------------|-----------------|-------------------|-------------------|---------------------------------|
| 1.16 | Use drugs or other substances such as whitener, iodex, puncture tube fluid, smack, and/or solvent? <sup>a</sup> | None         | Few             | Some              | Most              | Almost all/All                  |
| 1.17 | Smoke cigarettes?                                                                                               | None         | Few             | Some              | Most              | Almost all/All                  |
| 1.18 | Use alcohol?                                                                                                    | None         | Few             | Some              | Most              | Almost all/All                  |
| 1.19 | Have enough to eat?                                                                                             | None         | Few             | Some              | Most              | Almost all/All                  |
| 1.20 | Eat discarded and/or spoiled food?                                                                              | None         | Few             | Some              | Most              | Almost all/All                  |
| 1.21 | Have problems sleeping?                                                                                         | None         | Few             | Some              | Most              | Almost all/All                  |
| 1.22 | Feel tired throughout the day?                                                                                  | None         | Few             | Some              | Most              | Almost all/All                  |
| 1.23 | Have received complete routine immunization?                                                                    | None         | Few             | Some              | Most              | Almost all/All                  |
| 1.24 | Need <i>medical care</i> but do not receive it because they cannot afford it?                                   | None         | Few             | Some              | Most              | Almost all/All                  |
| 1.25 | Need <i>medication</i> but do not receive it because they cannot afford it?                                     | None         | Few             | Some              | Most              | Almost all/All                  |
| 1.26 | Have died from health-related problems?                                                                         | None         | Few             | Some              | Most              | Almost all/All                  |

<sup>a</sup> Item adapted for use in India.

Do not distribute without written consent. For more information, please contact:

**Theresa S. Betancourt, Sc.D., M.A.**

Director, Research Program on Children and Global Adversity | Harvard T.H. Chan School of Public Health  
Department of Global Health and Population | Email: Theresa\_Betancourt@harvard.edu

# SAFE Checklist

## To Advance the Protection of Children & Youth

### PART 2

The next set of questions asks about things relating to children (ages 0-18) and their relationships with their family, friends, and community. **Please circle the answer to the following questions to the best of your knowledge.** You may not know all the answers. If you cannot answer a question, please leave the question blank.

|      | To the best of your knowledge, <u>how many of the children</u> (ages 0-18) at the [NAME OF SITE] currently:                | None (0%) | Few (1%-25%) | Some (26%-50%) | Most (51%-75%) | Almost all/All (76%-100%) |
|------|----------------------------------------------------------------------------------------------------------------------------|-----------|--------------|----------------|----------------|---------------------------|
| 2.1  | Have to care for younger children without the help of an adult?                                                            | None      | Few          | Some           | Most           | Almost all/All            |
| 2.2  | Are burned, hit, punched, shaken, kicked, and/or beaten <u>in the home</u> ?                                               | None      | Few          | Some           | Most           | Almost all/All            |
| 2.3  | Are threatened, intimidated, yelled at harshly, name-called, accused, and/or humiliated <u>in the home</u> ?               | None      | Few          | Some           | Most           | Almost all/All            |
| 2.4  | Are inappropriately <u>touched</u> in the home?                                                                            | None      | Few          | Some           | Most           | Almost all/All            |
| 2.5  | Are raped <u>in the home</u> ?                                                                                             | None      | Few          | Some           | Most           | Almost all/All            |
| 2.6  | Witness community violence such as assault, use of weapons, muggings, gang violence, and/or police brutality?              | None      | Few          | Some           | Most           | Almost all/All            |
| 2.7  | Are treated badly by others because of race, ethnicity, gender, caste, illness, disability, and/or religion?               | None      | Few          | Some           | Most           | Almost all/All            |
| 2.8  | Have at least one family or household member who abuses drugs?                                                             | None      | Few          | Some           | Most           | Almost all/All            |
| 2.9  | Have at least one family or household member who abuses alcohol?                                                           | None      | Few          | Some           | Most           | Almost all/All            |
| 2.10 | Have a relationship with a trusted individual who provides them with care?                                                 | None      | Few          | Some           | Most           | Almost all/All            |
|      | To the best of your knowledge, <u>how many of the children</u> (ages 0-18) at the [NAME OF SITE] currently have access to: | None (0%) | Few (1%-25%) | Some (26%-50%) | Most (51%-75%) | Almost all/All (76%-100%) |
| 2.11 | Social service and/or child welfare organizations?                                                                         | None      | Few          | Some           | Most           | Almost all/All            |
| 2.12 | Religious, spiritual, dance, arts, and/or sports programs?                                                                 | None      | Few          | Some           | Most           | Almost all/All            |
| 2.13 | Services that reunite separated children to their families?                                                                | None      | Few          | Some           | Most           | Almost all/All            |

<sup>a</sup> Item adapted for use in India.

**Do not distribute without written consent.** For more information, please contact:

**Theresa S. Betancourt, Sc.D., M.A.**

Director, Research Program on Children and Global Adversity | Harvard T.H. Chan School of Public Health  
Department of Global Health and Population | Email: Theresa\_Betancourt@harvard.edu

# SAFE Checklist

## To Advance the Protection of Children & Youth

|      | To the best of your knowledge:                                   | None (0%) | Few (1%-25%) | Some (26%-50%) | Most (51%-75%) | Almost all/All (76%-100%) |
|------|------------------------------------------------------------------|-----------|--------------|----------------|----------------|---------------------------|
| 2.14 | How many of the young girls (ages 0-18) at the site are married? | None      | Few          | Some           | Most           | Almost all/All            |
| 2.15 | How many of the young boys (ages 0-18) at the site are married?  | None      | Few          | Some           | Most           | Almost all/All            |

### PART 3

*The next set of questions asks about things relating to children (ages 0-18) and their exposure to harm, violence, and physical and emotional safety. **Please circle the answer to the following questions to the best of your knowledge.** You may not know all the answers. If you cannot answer a question, please leave the question blank.*

|     | To the best of your knowledge, in the past 6 months, <u>how many of the children</u> (ages 0-18) at the [NAME OF SITE] were: | None (0%) | Few (1%-25%) | Some (26%-50%) | Most (51%-75%) | Almost all/All (76%-100%) |
|-----|------------------------------------------------------------------------------------------------------------------------------|-----------|--------------|----------------|----------------|---------------------------|
| 3.1 | Burned, hit, punched, shaken, kicked, or beaten <u>at the site?</u>                                                          | None      | Few          | Some           | Most           | Almost all/All            |
| 3.2 | Inappropriately touched <u>at the site?</u>                                                                                  | None      | Few          | Some           | Most           | Almost all/All            |
| 3.3 | Raped <u>at the site?</u>                                                                                                    | None      | Few          | Some           | Most           | Almost all/All            |
| 3.4 | Threatened, intimidated, yelled at harshly, name-called, accused, and/or humiliated <u>at the site?</u>                      | None      | Few          | Some           | Most           | Almost all/All            |
| 3.5 | Killed by violence <u>at the site?</u>                                                                                       | None      | Few          | Some           | Most           | Almost all/All            |
| 3.6 | Killed by accidents <u>at the site?</u>                                                                                      | None      | Few          | Some           | Most           | Almost all/All            |
| 3.7 | Using weapons such as guns, knives, and/or sharp objects to hurt others <u>at the site?</u>                                  | None      | Few          | Some           | Most           | Almost all/All            |

<sup>a</sup> Item adapted for use in India.

**Do not distribute without written consent.** For more information, please contact:

**Theresa S. Betancourt, Sc.D., M.A.**

Director, Research Program on Children and Global Adversity | Harvard T.H. Chan School of Public Health  
Department of Global Health and Population | Email: Theresa\_Betancourt@harvard.edu

# SAFE Checklist

## To Advance the Protection of Children & Youth

|      |                                                                                                                                   |                      |                         |                           |                           |                                          |
|------|-----------------------------------------------------------------------------------------------------------------------------------|----------------------|-------------------------|---------------------------|---------------------------|------------------------------------------|
| 3.8  | Living without a parent or another adult who takes care of them <u>at the site?</u>                                               | None                 | Few                     | Some                      | Most                      | Almost all/All                           |
| 3.9  | Exposed to unsafe chemicals in the air, water, and/or home environment <u>at the site?</u>                                        | None                 | Few                     | Some                      | Most                      | Almost all/All                           |
| 3.10 | Living in a space that is not protected from cold, damp, heat, rain, and/or wind?                                                 | None                 | Few                     | Some                      | Most                      | Almost all/All                           |
| 3.11 | Left their homes to make money for their families?                                                                                | None                 | Few                     | Some                      | Most                      | Almost all/all                           |
| 3.12 | Left their homes due to violence and/or abuse?                                                                                    | None                 | Few                     | Some                      | Most                      | Almost all/All                           |
|      | <b>To the best of your knowledge, <u>how many of the children (ages 0-18)</u> at the [NAME OF SITE] currently have access to:</b> |                      |                         |                           |                           |                                          |
| 3.13 | Toilets?                                                                                                                          | None                 | Few                     | Some                      | Most                      | Almost all/All                           |
| 3.14 | Separate toilets for girls and boys?                                                                                              | None                 | Few                     | Some                      | Most                      | Almost all/All                           |
| 3.15 | Washing facilities?                                                                                                               | None                 | Few                     | Some                      | Most                      | Almost all/All                           |
| 3.16 | Separate washing facilities for girls and boys?                                                                                   | None                 | Few                     | Some                      | Most                      | Almost all/All                           |
|      | <b>To the best of your knowledge, <u>please answer “yes” or “no”</u> to the following questions:</b>                              |                      |                         |                           |                           |                                          |
| 3.17 | Are there are toilets with locks inside the door?                                                                                 | Yes                  | No                      |                           |                           |                                          |
| 3.18 | Are there are washing facilities with locks inside the door?                                                                      | Yes                  | No                      |                           |                           |                                          |
|      | <b>To the best of your knowledge, <u>how many of the children (age 0-18)</u> at the [NAME OF SITE] have access to:</b>            | <b>None<br/>(0%)</b> | <b>Few<br/>(1%-25%)</b> | <b>Some<br/>(26%-50%)</b> | <b>Most<br/>(51%-75%)</b> | <b>Almost<br/>all/All<br/>(76%-100%)</b> |
| 3.19 | Police whom they trust to provide protection?                                                                                     | None                 | Few                     | Some                      | Most                      | Almost all/All                           |
| 3.20 | Friends and/or peers whom they trust to provide protection?                                                                       | None                 | Few                     | Some                      | Most                      | Almost all/All                           |
| 3.21 | Weapons such as knives, guns, and/or sharp objects?                                                                               | None                 | Few                     | Some                      | Most                      | Almost all/All                           |

<sup>a</sup> Item adapted for use in India.

**Do not distribute without written consent.** For more information, please contact:

**Theresa S. Betancourt, Sc.D., M.A.**

Director, Research Program on Children and Global Adversity | Harvard T.H. Chan School of Public Health  
Department of Global Health and Population | Email: Theresa\_Betancourt@harvard.edu

# SAFE Checklist

## To Advance the Protection of Children & Youth

### PART 4

The next set of questions ask about things relating to education for children (ages 0-18) at the [NAME OF SITE]. In addition, some questions also ask about economic security for children and their families. **Please circle the answer to the following questions to the best of your knowledge.** You may not know all the answers. If you cannot answer a question, please leave the question blank.

|      | To the best of your knowledge, <u>how many of the children</u> (ages 0-18) [NAME OF SITE] currently:                                                                                 | None (0%) | Few (1%-25%) | Some (26%-50%) | Most (51%-75%) | Almost all/All (76%-100%) |
|------|--------------------------------------------------------------------------------------------------------------------------------------------------------------------------------------|-----------|--------------|----------------|----------------|---------------------------|
| 4.1  | Attend school?                                                                                                                                                                       | None      | Few          | Some           | Most           | Almost all/All            |
| 4.2  | Of appropriate age attend an early education learning program, such as Aanganwadi Centers? <sup>a</sup>                                                                              | None      | Few          | Some           | Most           | Almost all/All            |
| 4.3  | Of appropriate age <i>attend</i> primary school?                                                                                                                                     | None      | Few          | Some           | Most           | Almost all/All            |
| 4.4  | Of appropriate age <i>complete</i> primary school?                                                                                                                                   | None      | Few          | Some           | Most           | Almost all/All            |
| 4.5  | Of appropriate age <i>attend</i> secondary school?                                                                                                                                   | None      | Few          | Some           | Most           | Almost all/All            |
| 4.6  | Of appropriate age <i>complete</i> secondary school?                                                                                                                                 | None      | Few          | Some           | Most           | Almost all/All            |
| 4.7  | Attend a non-formal and/or informal learning program such as skill building, vocational training, tailoring, IT courses, computer literacy, and/or informal apprenticeship programs? | None      | Few          | Some           | Most           | Almost all/All            |
| 4.8  | Are on the street, at the market, at the railways, and/or at the worksite during school hours?                                                                                       | None      | Few          | Some           | Most           | Almost all/All            |
| 4.9  | Are burned, hit, punched, shaken, kicked, and/or beaten by students, teachers, and/or other people in school?                                                                        | None      | Few          | Some           | Most           | Almost all/All            |
| 4.10 | Are inappropriately touched by students, teachers, and/or other people in school?                                                                                                    | None      | Few          | Some           | Most           | Almost all/All            |
| 4.11 | Are raped by students, teachers, and/or other people in school?                                                                                                                      | None      | Few          | Some           | Most           | Almost all/All            |
| 4.12 | Are threatened, intimidated, yelled at harshly, name-called, accused, and/or humiliated by students, teachers, and/or other people in school?                                        | None      | Few          | Some           | Most           | Almost all/All            |

<sup>a</sup> Item adapted for use in India.

Do not distribute without written consent. For more information, please contact:

**Theresa S. Betancourt, Sc.D., M.A.**

Director, Research Program on Children and Global Adversity | Harvard T.H. Chan School of Public Health  
Department of Global Health and Population | Email: Theresa\_Betancourt@harvard.edu

# SAFE Checklist

## To Advance the Protection of Children & Youth

|      |                                                                                                                                               |      |     |      |      |                |
|------|-----------------------------------------------------------------------------------------------------------------------------------------------|------|-----|------|------|----------------|
| 4.13 | Are treated badly because of race, ethnicity, gender, caste, illness, disability, and/or religion by students, teachers, and/or other people? | None | Few | Some | Most | Almost all/All |
| 4.14 | Attend schools that have teachers who are frequently changing?                                                                                | None | Few | Some | Most | Almost all/All |
| 4.15 | Attend schools that provide a mid-day meal?                                                                                                   | None | Few | Some | Most | Almost all/All |
| 4.16 | Attend schools that employ teachers who have adequate years of schooling?                                                                     | None | Few | Some | Most | Almost all/All |
| 4.17 | Have their own chair or bench to sit on at school?                                                                                            | None | Few | Some | Most | Almost all/All |
| 4.18 | Have their own textbooks at school?                                                                                                           | None | Few | Some | Most | Almost all/All |

|      | <b>To the best of your knowledge, <u>how many of the children</u> (ages 0-18) at the [NAME OF SITE] currently cannot attend school due to:</b> | <b>None<br/>(0%)</b> | <b>Few<br/>(1%-25%)</b> | <b>Some<br/>(26%-50%)</b> | <b>Most<br/>(51%-75%)</b> | <b>Almost<br/>all/All<br/>(76%-100%)</b> |
|------|------------------------------------------------------------------------------------------------------------------------------------------------|----------------------|-------------------------|---------------------------|---------------------------|------------------------------------------|
| 4.19 | Travel time and/or distance between [NAME OF SITE] and the school?                                                                             |                      |                         |                           |                           |                                          |
| 4.20 | School fees?                                                                                                                                   | None                 | Few                     | Some                      | Most                      | Almost all/All                           |
| 4.21 | Need to earn money for household?                                                                                                              | None                 | Few                     | Some                      | Most                      | Almost all/All                           |
| 4.22 | Transportation costs?                                                                                                                          | None                 | Few                     | Some                      | Most                      | Almost all/All                           |
| 4.23 | Cost of clothing such as uniforms and/or shoes?                                                                                                | None                 | Few                     | Some                      | Most                      | Almost all/All                           |
| 4.24 | Need to look after other children?                                                                                                             | None                 | Few                     | Some                      | Most                      | Almost all/All                           |
| 4.25 | Need to look after an adult?                                                                                                                   | None                 | Few                     | Some                      | Most                      | Almost all/All                           |
| 4.26 | No schools in the area?                                                                                                                        | None                 | Few                     | Some                      | Most                      | Almost all/All                           |
| 4.27 | Not enough teachers?                                                                                                                           | None                 | Few                     | Some                      | Most                      | Almost all/All                           |
| 4.28 | Language spoken at school?                                                                                                                     | None                 | Few                     | Some                      | Most                      | Almost all/All                           |
| 4.29 | Lack of space in school for more students?                                                                                                     | None                 | Few                     | Some                      | Most                      | Almost all/All                           |
| 4.30 | Pregnancy?                                                                                                                                     | None                 | Few                     | Some                      | Most                      | Almost all/All                           |
| 4.31 | Marriage?                                                                                                                                      | None                 | Few                     | Some                      | Most                      | Almost all/All                           |

<sup>a</sup> Item adapted for use in India.

**Do not distribute without written consent.** For more information, please contact:

**Theresa S. Betancourt, Sc.D., M.A.**

Director, Research Program on Children and Global Adversity | Harvard T.H. Chan School of Public Health  
Department of Global Health and Population | Email: Theresa\_Betancourt@harvard.edu

# SAFE Checklist

## To Advance the Protection of Children & Youth

|      | To the best of your knowledge, <u>how many of the children</u> (ages 0-18) at the [NAME OF SITE] currently cannot attend school due to: | None (0%) | Few (1%-25%) | Some (26%-50%) | Most (51%-75%) | Almost all/All (76%-100%) |
|------|-----------------------------------------------------------------------------------------------------------------------------------------|-----------|--------------|----------------|----------------|---------------------------|
| 4.32 | Household chores within the family home?                                                                                                | None      | Few          | Some           | Most           | Almost all/All            |
| 4.33 | Domestic labor such as cooking and/or cleaning outside the family home?                                                                 | None      | Few          | Some           | Most           | Almost all/All            |
| 4.34 | Selling things on the street?                                                                                                           | None      | Few          | Some           | Most           | Almost all/All            |
| 4.35 | Working in the fields?                                                                                                                  | None      | Few          | Some           | Most           | Almost all/All            |
| 4.36 | Sex work such as prostitution?                                                                                                          | None      | Few          | Some           | Most           | Almost all/All            |
| 4.37 | Illegal activities such as selling drugs or stealing?                                                                                   | None      | Few          | Some           | Most           | Almost all/All            |
| 4.38 | Scavenging for bottles and/or trash?                                                                                                    | None      | Few          | Some           | Most           | Almost all/All            |
| 4.39 | Hazardous work that harms health and/or safety?                                                                                         | None      | Few          | Some           | Most           | Almost all/All            |
| 4.40 | Drug abuse?                                                                                                                             | None      | Few          | Some           | Most           | Almost all/All            |
| 4.41 | Corporal punishment in schools?                                                                                                         | None      | Few          | Some           | Most           | Almost all/All            |
| 4.42 | Lack of proper documentation from previous schools?                                                                                     | None      | Few          | Some           | Most           | Almost all/All            |

### PART 5

*The following questions ask about issues relating to income and economic stability for children (ages 0-18) and their families at the [NAME OF SITE]. Please circle the answer to the following questions to the best of your knowledge. You may not know all the answers. If you do not have ANY information to answer a question, please leave the question blank.*

|     | To the best of your knowledge, in the last 6 months, <u>how many of the children</u> (ages 0-18) <u>and/or families</u> at the [NAME OF SITE] have been: | None (0%) | Few (1%-25%) | Some (26%-50%) | Most (51%-75%) | Almost all/All (76%-100%) |
|-----|----------------------------------------------------------------------------------------------------------------------------------------------------------|-----------|--------------|----------------|----------------|---------------------------|
| 5.1 | Unable to afford basic needs, such as food, water, shelter, and/or clothing?                                                                             | None      | Few          | Some           | Most           | Almost all/All            |
| 5.2 | Unable to save money?                                                                                                                                    | None      | Few          | Some           | Most           | Almost all/All            |

<sup>a</sup> Item adapted for use in India.

Do not distribute without written consent. For more information, please contact:

**Theresa S. Betancourt, Sc.D., M.A.**

Director, Research Program on Children and Global Adversity | Harvard T.H. Chan School of Public Health  
Department of Global Health and Population | Email: Theresa\_Betancourt@harvard.edu



# SAFE Checklist

## To Advance the Protection of Children & Youth

|     |                                                                                                                                                |      |     |      |      |                |
|-----|------------------------------------------------------------------------------------------------------------------------------------------------|------|-----|------|------|----------------|
| 5.3 | Borrowing money from the bank, friends, and/or other individuals?                                                                              | None | Few | Some | Most | Almost all/All |
| 5.4 | Owe money to others?                                                                                                                           | None | Few | Some | Most | Almost all/All |
|     | <b>To the best of your knowledge, <u>how many of the children (ages 0-18) and/or families</u> at the [NAME OF SITE] <u>have access to:</u></b> |      |     |      |      |                |
| 5.5 | Vocational training opportunities?                                                                                                             | None | Few | Some | Most | Almost all/All |
| 5.6 | Informal micro-lending schemes such as community loans?                                                                                        | None | Few | Some | Most | Almost all/All |

<sup>a</sup> Item adapted for use in India.

**Do not distribute without written consent.** For more information, please contact:

**Theresa S. Betancourt, Sc.D., M.A.**

Director, Research Program on Children and Global Adversity | Harvard T.H. Chan School of Public Health  
Department of Global Health and Population | Email: [Theresa\\_Betancourt@harvard.edu](mailto:Theresa_Betancourt@harvard.edu)
